# Supplementary material for: Enhanced gas-sensing performance of SnO2/Nb2O5 hybrid nanowires
Source: Royal Society of Chemistry journal article supplement (doi:10.1039/c6ra21672b), 2016-01-01
Supplement: c6ra21672b1.pdf [file c6ra21672b1.pdf]

## Supporting Information

### Enhanced gas-sensing performance of SnO<sub>2</sub>/Nb<sub>2</sub>O<sub>5</sub> hybrid nanowires

*Qi Sun,<sup>1</sup> Kaidi Diao,<sup>2</sup> Tulai Sun,<sup>3</sup> Maozhong Li,<sup>4</sup> Xudong Cui,<sup>2\*</sup> He Tian,<sup>3</sup> Bin Xiang,<sup>1\*</sup>*

<sup>1</sup>Department of Materials Science & Engineering, CAS Key Lab of Materials for Energy Conversion, Synergetic Innovation Center of Quantum Information Quantum Physics, University of Science and Technology of China, Hefei, Anhui 230026, China.

<sup>2</sup>Science and Technology on Plasma Physics Laboratory, Research Center of Laser Fusion, CAEP, Sichuan, 621900, China.

<sup>3</sup>Center of Electron Microscopy and State Key Laboratory of Silicon Materials, School of Materials Science and Engineering, Zhejiang University, Hangzhou 310027, China .

<sup>4</sup>Yunnan KIRO-CH Photonics Co., Ltd, No. 5 Hongwai road, Economic and Technological Development Zone, Kunming, China.

\*Corresponding author: [binxiang@ustc.edu.cn](mailto:binxiang@ustc.edu.cn); [xudcui@163.com](mailto:xudcui@163.com)

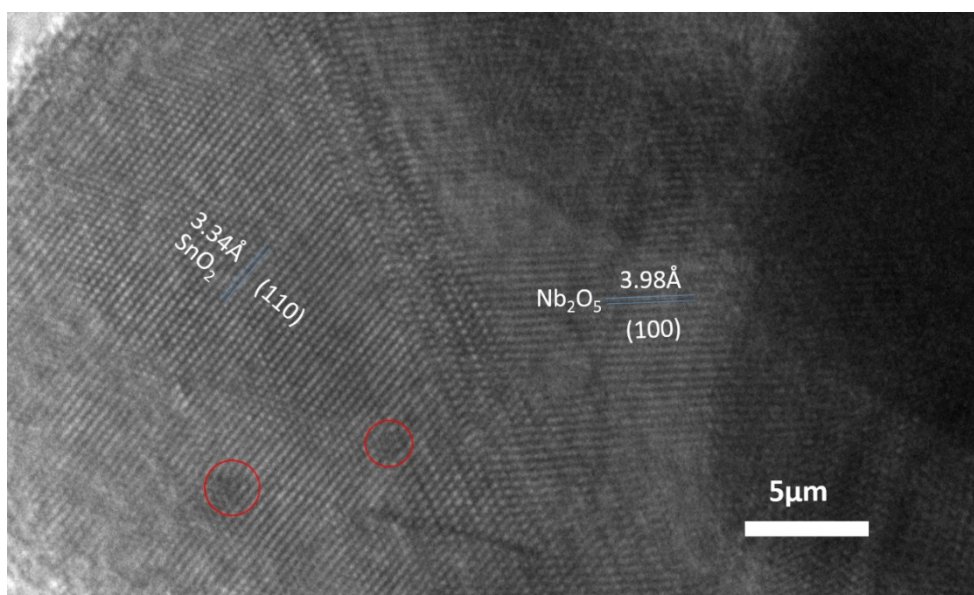

**Figure S1** The HRTEM image of SnO<sub>2</sub>/Nb<sub>2</sub>O<sub>5</sub>.

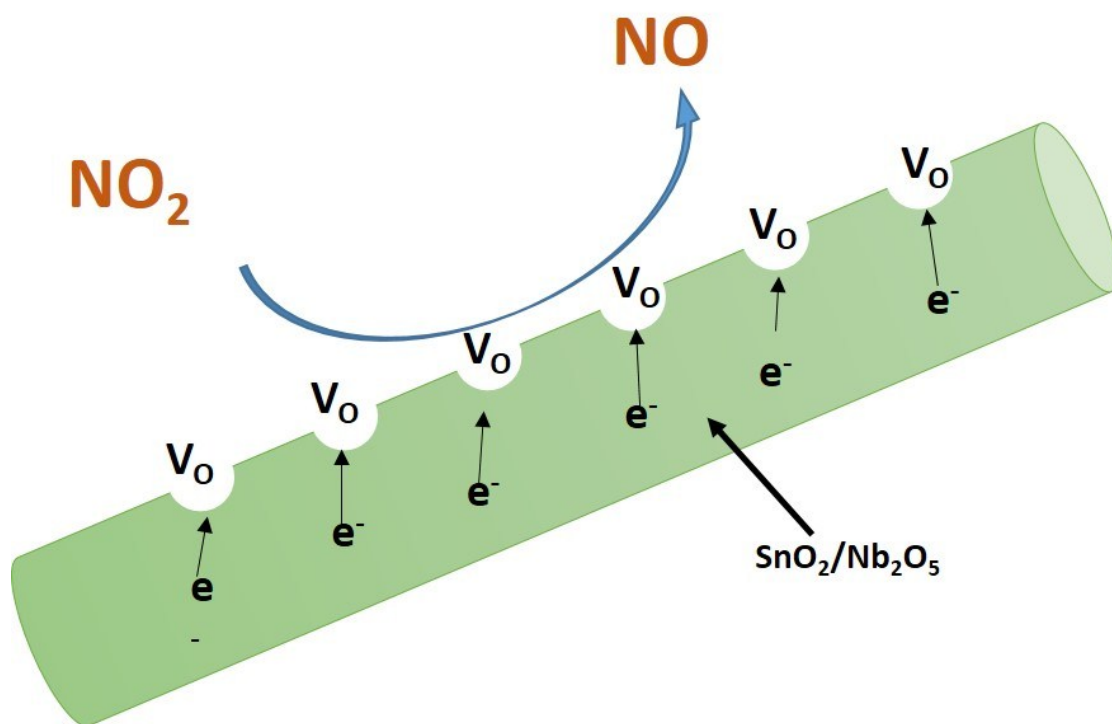

**Figure S2** Schematic diagram on sensing mechanism of  $\text{SnO}_2/\text{Nb}_2\text{O}_5$ .  $\text{V}_\text{o}$  represents oxygen vacancies.

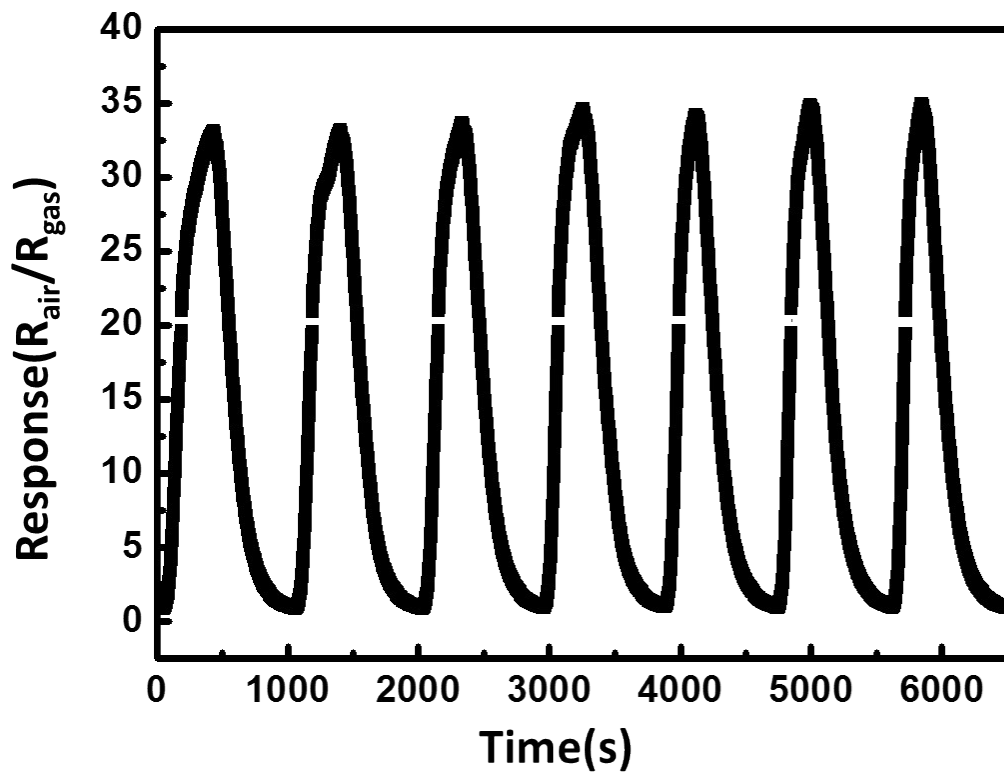

**Figure S3** The stability of  $\text{SnO}_2/\text{Nb}_2\text{O}_5$  sensor

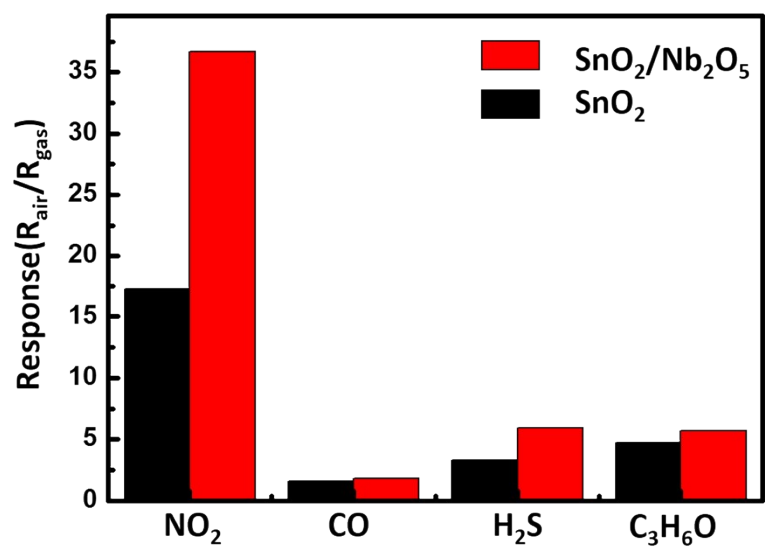

**Figure S4** The selectivity of SnO<sub>2</sub> and SnO<sub>2</sub>/Nb<sub>2</sub>O<sub>5</sub> sensor

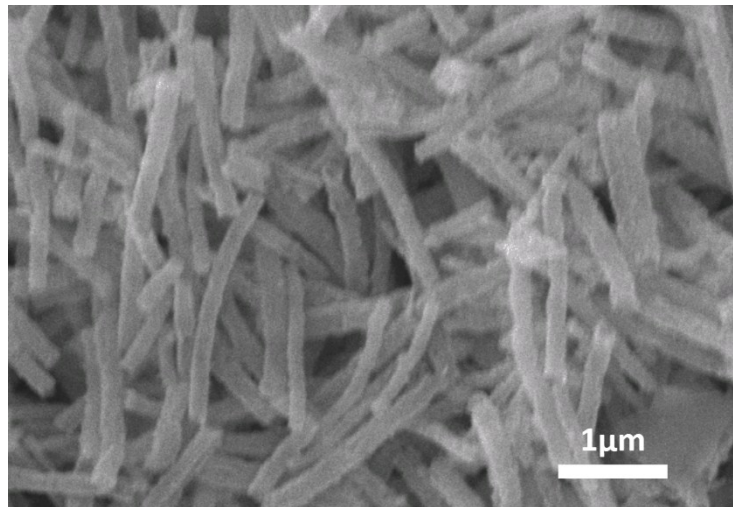

**Figure S5** The SEM image of  $\text{SnO}_2/\text{Nb}_2\text{O}_5$  after sensing measurements

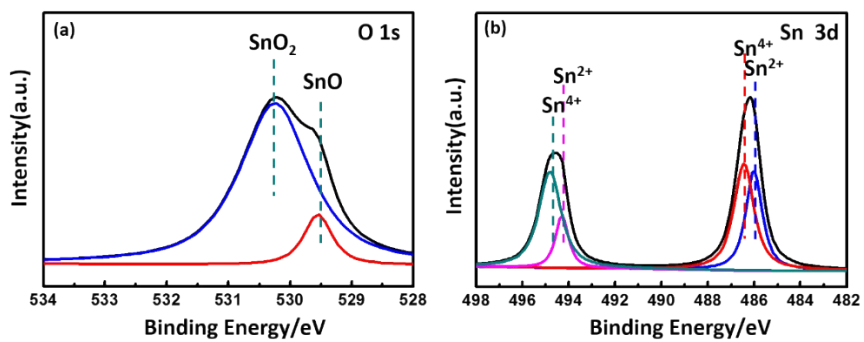

**Figure S6** The high resolution XPS spectra showing the binding energy of (a) O 1s and (b) Sn 3d

**Table S1** the response and recovery time of my sample and literature.

|                                                  | <b>State</b>         | <b>Conditions</b> | <b>Response time</b> | <b>Recovery time</b> |
|--------------------------------------------------|----------------------|-------------------|----------------------|----------------------|
| SnO <sub>2</sub> <sup>S1</sup>                   | Thin films,          | 350°C, 0.1ppm     | Several minutes      | Several minutes      |
| In <sub>2</sub> O <sub>3</sub> <sup>S2</sup>     | Thick film           | 300°C, 0.1ppm     | ~1min                | ~10min               |
| SnO <sub>2</sub> /Nb <sub>2</sub> O <sub>5</sub> | The sample, nanowire | 250°C, 0.5ppm     | ~10min               | ~7.5min              |

### References

- [S1] M. Epifania, E. Comini, J. Arbiol, R. Díaz, N. Sergent, T. Pagnier, P. Siciliano, G. Fagli, J. R. Morante, *Sensors and Actuators B: Chemical*, 2008, **130**, 483–487.
- [S2] L. Berry, J. Brunet, *Sensors and Actuators, B: Chemical*, 2008, **129**, 450–458.
